# Supplementary material
Source: Frontiers journal article supplement (https://www.frontiersin.org/articles/342095)
Supplement: Data_Sheet_1.PDF [file Data_Sheet_1.PDF]

## KESSLER'S PSYCHOLOGICAL DISTRESS SCALE

These questions concern how you have been feeling over the past 30 days. Tick a box below each question that best represents how you have been

1. During the last 30 days, about how often did you feel tired out for no good reason?

|                     |                         |                     |                     |                    |
|---------------------|-------------------------|---------------------|---------------------|--------------------|
| 1. None of the time | 2. A little of the time | 3. Some of the time | 4. Most of the time | 5. All of the time |
|---------------------|-------------------------|---------------------|---------------------|--------------------|

2. During the last 30 days, about how often did you feel nervous?

|                     |                         |                     |                     |                    |
|---------------------|-------------------------|---------------------|---------------------|--------------------|
| 1. None of the time | 2. A little of the time | 3. Some of the time | 4. Most of the time | 5. All of the time |
|---------------------|-------------------------|---------------------|---------------------|--------------------|

3. During the last 30 days, about how often did you feel so nervous that nothing could calm you down?

|                     |                         |                     |                     |                    |
|---------------------|-------------------------|---------------------|---------------------|--------------------|
| 1. None of the time | 2. A little of the time | 3. Some of the time | 4. Most of the time | 5. All of the time |
|---------------------|-------------------------|---------------------|---------------------|--------------------|

4. During the last 30 days, about how often did you feel hopeless?

|                     |                         |                     |                     |                    |
|---------------------|-------------------------|---------------------|---------------------|--------------------|
| 1. None of the time | 2. A little of the time | 3. Some of the time | 4. Most of the time | 5. All of the time |
|---------------------|-------------------------|---------------------|---------------------|--------------------|

5. During the last 30 days, about how often did you feel restless or fidgety?

|                     |                         |                     |                     |                    |
|---------------------|-------------------------|---------------------|---------------------|--------------------|
| 1. None of the time | 2. A little of the time | 3. Some of the time | 4. Most of the time | 5. All of the time |
|---------------------|-------------------------|---------------------|---------------------|--------------------|

6. During the last 30 days, about how often did you feel so restless you could not sit still?

|                     |                         |                     |                     |                    |
|---------------------|-------------------------|---------------------|---------------------|--------------------|
| 1. None of the time | 2. A little of the time | 3. Some of the time | 4. Most of the time | 5. All of the time |
|---------------------|-------------------------|---------------------|---------------------|--------------------|

7. During the last 30 days, about how often did you feel depressed?

|                     |                         |                     |                     |                    |
|---------------------|-------------------------|---------------------|---------------------|--------------------|
| 1. None of the time | 2. A little of the time | 3. Some of the time | 4. Most of the time | 5. All of the time |
|---------------------|-------------------------|---------------------|---------------------|--------------------|

8. During the last 30 days, about how often did you feel that everything was an effort?

|                     |                         |                     |                     |                    |
|---------------------|-------------------------|---------------------|---------------------|--------------------|
| 1. None of the time | 2. A little of the time | 3. Some of the time | 4. Most of the time | 5. All of the time |
|---------------------|-------------------------|---------------------|---------------------|--------------------|

9. During the last 30 days, about how often did you feel so sad that nothing could cheer you up?

|                     |                         |                     |                     |                    |
|---------------------|-------------------------|---------------------|---------------------|--------------------|
| 1. None of the time | 2. A little of the time | 3. Some of the time | 4. Most of the time | 5. All of the time |
|---------------------|-------------------------|---------------------|---------------------|--------------------|

10. During the last 30 days, about how often did you feel worthless?

|                     |                         |                     |                     |                    |
|---------------------|-------------------------|---------------------|---------------------|--------------------|
| 1. None of the time | 2. A little of the time | 3. Some of the time | 4. Most of the time | 5. All of the time |
|---------------------|-------------------------|---------------------|---------------------|--------------------|
